# Supplementary material for: Phenotypic Investigation and Detection of Biofilm-Associated Genes in Acinetobacter baumannii Isolates, Obtained from Companion Animals
Source: MDPI journal article supplement (doi:10.3390/tropicalmed9050109), 2024-05-11
Supplement: s1 [file s1]

## Sheet: Acinetobacter
Isolate code	Origin	Sample	City	ΙΜΙ	SAM	PIT	CAZ	FEP	AK	GEN	TOB	ENR	CIP	SXT	DO	MI	1st well	2nd well	3rd well	mean absorance	Biofilm production	bap	blaPER	csu	ompA
A1	Canine	Soft tissue	Thessaloniki	9	11	9	9	6	9	6	6	6	6	6	6	13	223	245	262	243.333	moderate	bap	blaPER	csu	ompA
A2	Canine	Pleural effusion	Athens	28	19	26	20	20	25	25	23	12	6	25	18	22	536	618	652	602	strong	bap	ND	ND	ompA
A3	Canine	Soft tissue	Thessaloniki	10	10	9	10	6	10	6	6	6	6	6	6	14	142	195	198	178.333	weak	bap	ND	csu	ompA
A4	Feline	Soft tissue	Thessaloniki	9	11	9	9	6	9	10	6	6	6	6	6	11	294	159	182	211.667	weak	bap	ND	csu	ompA
A5	Feline	Urine	Thessaloniki	10	9	10	10	6	22	8	22	11	6	6	6	15	259	262	231	250.667	moderate	bap	ND	csu	ompA
A6	Feline	Urine	Thessaloniki	9	7	9	9	6	9	6	6	6	6	6	6	12	232	257	332	273.667	moderate	bap	blaPER	csu	ompA
A7	Canine	Soft tissue	Serres	11	8	10	11	6	11	6	6	10	6	6	6	13	316	401	321	346	moderate	bap	blaPER	csu	ompA
A8	Canine	Soft tissue	Thessaloniki	10	8	10	10	6	9	6	6	9	6	6	6	14	212	252	224	229.333	moderate	bap	ND	csu	ompA
A9	Canine	Soft tissue	Athens	28	19	23	22	21	21	13	20	11	6	20	13	22	777	689	624	696.667	strong	bap	blaPER	csu	ompA
A10	Canine	Soft tissue	Athens	28	20	23	23	20	17	16	18	6	6	20	12	19	652	602	762	672	strong	bap	blaPER	csu	ompA
A11	Canine	Soft tissue	Athens	11	11	12	11	6	9	6	6	6	6	6	6	15	349	292	437	359.333	moderate	bap	blaPER	csu	ompA
A12	Feline	Nasal cavity	Athens	28	23	23	23	17	15	12	16	11	6	20	11	19	1354	1145	1247	1248.67	strong	bap	blaPER	csu	ompA
A13	Canine	Soft tissue	Thessaloniki	10	10	9	10	6	11	11	12	11	6	6	6	11	237	183	194	204.667	weak	bap	ND	csu	ompA
A14	Feline	Urine	Thessaloniki	10	8	10	10	6	11	6	6	10	6	6	6	13	169	182	221	190.667	weak	bap	ND	csu	ompA
A15	Canine	Soft tissue	Thessaloniki	11	10	11	10	6	10	8	9	6	6	6	6	15	242	277	329	282.667	moderate	bap	ND	csu	ompA
A16	Feline	Soft tissue	Athens	26	24	23	19	20	15	13	15	12	8	17	10	17	779	558	652	663	strong	bap	blaPER	csu	ompA
A17	Canine	Pleural effusion	Athens	28	23	24	22	21	17	11	18	6	6	18	11	17	683	692	643	672.667	strong	bap	blaPER	csu	ompA
A18	Feline	Soft tissue	Athens	20	21	19	20	16	17	13	16	11	6	6	9	17	685	616	745	682	strong	bap	blaPER	csu	ompA
A19	Canine	Soft tissue	Athens	29	23	23	23	21	15	13	15	6	6	21	17	20	1340	1454	1347	1380.33	strong	bap	blaPER	csu	ompA
A20	Feline	Urine	Thessaloniki	9	10	9	11	6	9	8	6	11	6	6	6	10	488	505	518	503.667	strong	bap	blaPER	csu	ompA
A21	Canine	Urine	Athens	12	10	11	8	6	18	16	18	10	9	6	8	15	1312	1156	1209	1225.67	strong	bap	blaPER	csu	ompA
A22	Feline	Urine	Thessaloniki	27	17	18	13	11	23	14	23	6	6	6	6	18	237	168	177	194	weak	bap	ND	csu	ompA
A23	Feline	Urine	Athens	27	22	23	21	15	15	11	15	6	6	18	15	20	589	484	500	524.333	strong	bap	blaPER	csu	ompA
A24	Feline	Nasal cavity	Larissa	26	23	24	23	22	17	12	16	10	6	20	11	18	723	579	725	675.667	strong	bap	blaPER	csu	ompA
A25	Canine	Ear canal	Athens	26	24	24	21	15	16	8	14	8	6	19	9	18	701	562	724	662.333	strong	bap	blaPER	csu	ompA
A26	Canine	Urine	Athens	19	22	18	19	16	17	14	16	6	6	6	7	15	853	981	826	886.667	strong	bap	blaPER	csu	ompA
A27	Feline	Ear canal	Athens	22	18	21	20	18	18	12	18	6	6	6	10	18	646	634	512	597.333	strong	bap	blaPER	csu	ompA
A28	Canine	Ear canal	Athens	21	23	20	20	17	15	12	15	6	6	6	9	18	488	553	534	525	strong	bap	blaPER	csu	ompA
A29	Feline	Urine	Thessaloniki	27	27	23	20	16	16	12	14	6	6	20	9	16	2872	2513	2627	2670.67	strong	bap	blaPER	csu	ompA
A30	Canine	Ear canal	Athens	31	25	24	20	21	19	12	22	6	6	21	21	22	1363	1452	1526	1447	strong	bap	blaPER	csu	ompA
A31	Canine	Soft tissue	Thessaloniki	9	11	10	11	6	10	6	6	6	6	6	6	12	117	144	134	131.667	weak	bap	ND	csu	ompA
A32	Canine	Soft tissue	Thessaloniki	11	10	10	11	6	10	6	6	6	6	6	6	14	334	336	241	303.667	moderate	bap	ND	csu	ND
A33	Canine	Soft tissue	Thessaloniki	30	26	24	21	20	14	10	17	8	8	20	9	17	451	597	412	486.667	strong	bap	blaPER	csu	ompA
A34	Canine	Soft tissue	Thessaloniki	11	8	9	10	6	6	6	6	6	6	6	6	18	192	202	234	209.333	weak	bap	blaPER	csu	ND
A35	Canine	Urine	Athens	10	11	10	10	6	22	11	22	6	6	6	6	17	545	428	456	476.333	strong	bap	blaPER	csu	ompA
A36	Canine	Soft tissue	Athens	22	25	21	21	20	17	10	16	6	6	8	12	18	1384	1393	1713	1496.67	strong	bap	ND	csu	ompA
A37	Canine	Urine	Thessaloniki	10	10	9	10	6	10	9	6	6	6	6	6	14	236	239	214	229.667	moderate	bap	ND	csu	ompA
A38	Feline	Soft tissue	Athens	24	23	21	23	18	17	12	17	6	6	17	11	18	629	809	564	667.333	strong	bap	blaPER	csu	ompA
A39	Feline	Urine	Thessaloniki	10	9	10	10	6	11	6	6	6	6	6	9	16	252	229	237	239.333	moderate	bap	ND	csu	ompA
A40	Canine	Soft tissue	Thessaloniki	7	10	10	12	6	11	6	6	6	6	6	6	15	303	256	350	303	moderate	bap	blaPER	csu	ompA
A41	Canine	Blood	Athens	27	22	19	23	15	17	13	17	6	6	18	12	18	862	1042	1173	1025.67	strong	bap	blaPER	csu	ompA
																				cut off: 110
				Footnotes - Abbreviations
				ND: Not detected
				AK: Amikacin, CAZ: Ceftazidime, CIP: Ciprofloxacin, DOX: Doxycycline, ENR, Enrofloxacin, FEP: Cefepime, GEN: Gentamicin, IMP: Imipenem, MIN: Minocycline, PIT: Piperacillin-tazobactam, SAM: Ampicillin-sulbactam, SXT: Sulfamethoxazole-Trimethoprim, TOB: Tobramycin
				Note: The numbers in the coloured cells represent the inhibition zone of the respective isolate for each antibiotic (6mm: disc diameter - absence of Inhibition zone).
				Resistant
				Intermediate
				Susceptible
